# Supplementary material for: Effect of restoration vegetation on the stochasticity of soil erosion in a semi-arid environment
Source: Copernicus journal article supplement (doi:10.5194/hess-2016-386), 2016-08-01
Supplement: Supplementary file [file hess-2016-386-AC2-supplement.pdf]

## 1           **Supplement: Description frameworks of random events**

2   Each observed stochastic weather condition with different durations in field monitoring  
3   period was defined as a random experiment. All possible outcomes of a random  
4   experiment constituted a sample space ( $\Omega$ ) defined as a random observational event  
5   (short for O event). Two mutually exclusive random event types—random rainfall event  
6   (I event) and random non-rainfall event (C event)—constituted the O event.  
7   Precipitation is a necessary condition of runoff production, therefore, the random runoff  
8   production event (R event) is a subset of I event. Similarly, R event is also a necessary  
9   condition of random sediment migration event (S event), causing S is contained in R.  
10   As a result, O, C, I, R, and S events constituted a random events framework (OCIRS)  
11   to describe the stochasticity of environment.

12    The random event duration in OCIRS is an important property of stochastic weather  
13    conditions. In particular, the duration property of I event was closely related to the  
14    transmission of stochastic signals of rainfall into the R and S events. According to the  
15    rainfall duration patterns in China (Wei et al., 2007; Yin et al., 2014), the time interval  
16    between two adjacent individual I events is set to be more than 6 hours, forming the  
17    criteria for individual rainfall classification. Therefore, we summarized duration  
18    property of all I events and classified them into four mutually exclusive I event types.  
19    They were a random extreme long rainfall event type (Ie event), a random general long  
20    duration rainfall event type (Il event), a random spanning rainfall event type (Is event)  
21    whose duration spans two consecutive days, and a random within rainfall event type  
22    (Iw event) generated in a day. Additionally, the C event can also be divided into two

23 types at daily scale. They are random non-rainfall event type lasting a whole day (Cd  
24 event), and random non-rainfall event type whose duration is less than 24 hours (Ch  
25 event) which is interrupted by I event. Table 1 summarized the physical, probabilistic  
26 properties and implication of all random event types in OCIRS. The determining  
27 process of all random event types in OCIRS was sketched by Figure 1a, and Venn  
28 diagrams in Figure 1c explored the relationships of all random event types in OCIRS.

29 In fact, various combinations of I and C events formed different random event  
30 sequences, constituting the observed stochastic weather condition over field monitoring  
31 period. Considering the observed longest duration of Ie event approximating 72 hours  
32 (Table 1), we defined a random event sequence unit (RESU) as a combing pattern of I  
33 and C events in three consecutive days, and summarized ten observed RESUs in five  
34 rainy seasons (Figure 1b).

35

36 **Reference:**

37 Wei, W., C. L., B. Fu, Z. Huang, D. Wu, and L. Gui (2007), The effect of land uses  
38 and rainfall regimes on runoff and soil erosion in the semi-arid loess hilly area, China,  
39 *Journal of Hydrology*, 335(3-4), 247-258.

40 Yin, S., Y. Wang, Y. Xie, and A. Liu (2014), Characteristics of intra-storm temporal  
41 pattern over China, *advances in Water Science (Chinese)*, 25(5), 617-624.

42

43

44

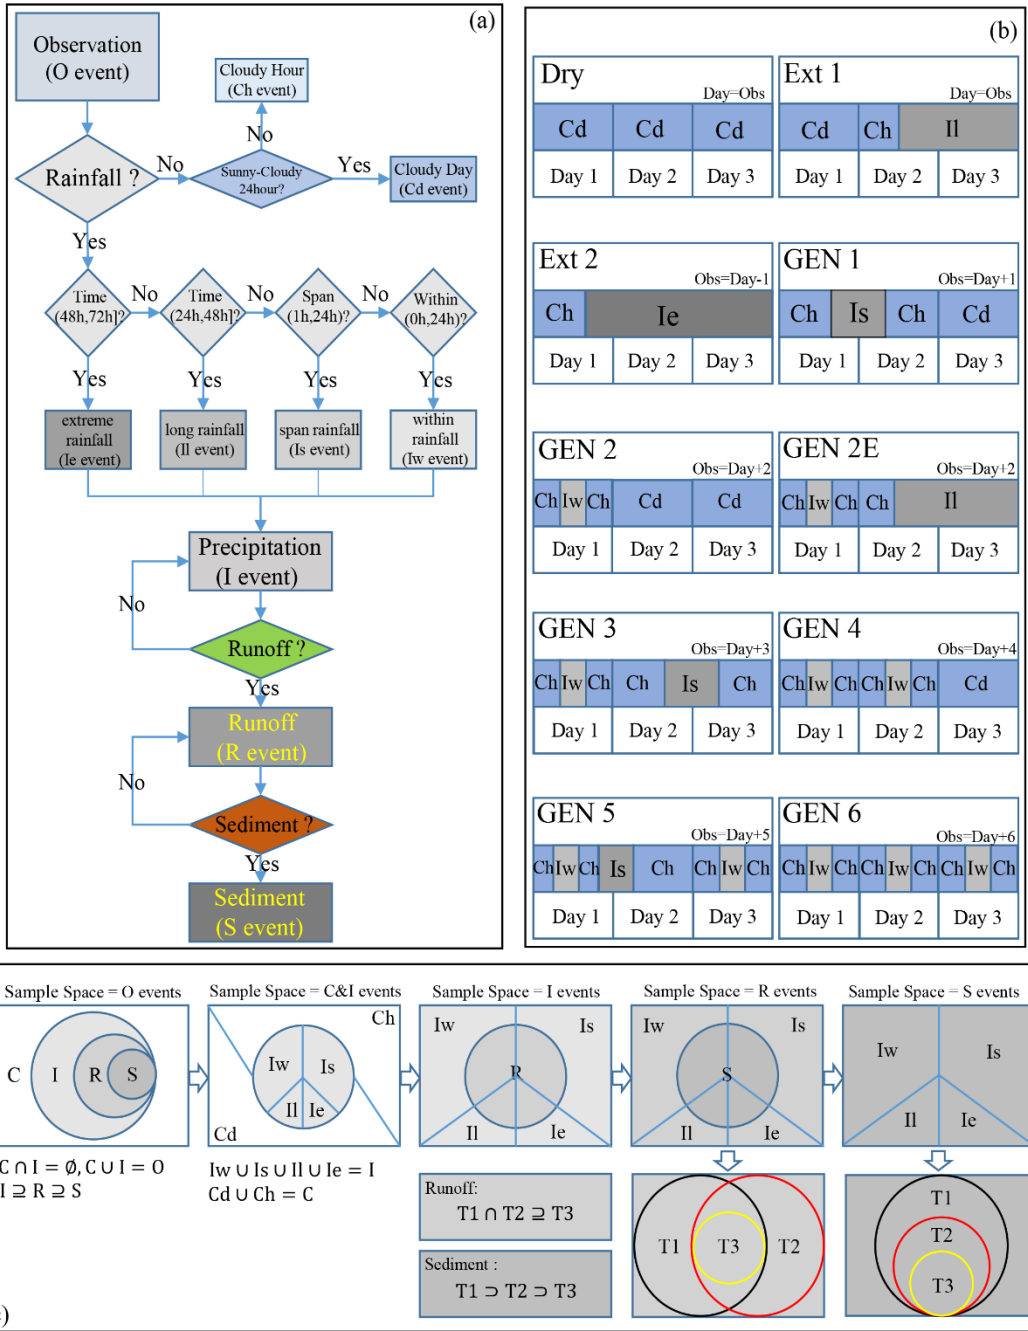

**Figure 1.** The OCIRS-RESU system: (a) a flow chart to determine all random event types in OCIRS framework; (b) the different combining patterns of rainfall and non-rainfall events in three consecutive days to form ten observed RESUs on five rainy seasons; (c) Venn diagram to reveal the relationship among all random events types in OCIRS framework.

**Table 1.** Physical and probabilistic meanings of all random event types in OCIRS

| symbol | Physical meaning of random event types                                                                                                                                    | Probabilistic meaning of random event types                                                                                                                                         | Influencing factors and implication                                                                                 |
|--------|---------------------------------------------------------------------------------------------------------------------------------------------------------------------------|-------------------------------------------------------------------------------------------------------------------------------------------------------------------------------------|---------------------------------------------------------------------------------------------------------------------|
| O      | observation events with time step ranging from 0 to 72 hours, including non-rainfall and rainfall events                                                                  | random events composing the sample space of OCIRS system. The probability $P(O) = 1$                                                                                                | indicating the general stochastic weather conditions over rainy seasons                                             |
| C      | non-rainfall events with time step ranging from 0 to 24 hours, including sunny or cloudy weather condition at hour or day scales                                          | random events, the probability of C events is the ratio of numbers of C events to O events $C \subset O, 0 \leq P(C) \leq P(O) = 1$                                                 | implying the extent of evaporation or potential evapotranspiration in weather condition.                            |
| Cd     | non-rainfall events with time step being 24 hours, including observed sunny or cloudy at day scale                                                                        | random events composing the subset of C events, $Cd \subseteq C, 0 \leq P(Cd) \leq P(C)$                                                                                            | implying the duration of evaporation or evapotranspiration at day scale                                             |
| Ch     | non-rainfall events with time step being less than 24hours, including observed sunny or cloudy at hour scales which intercepted by rainfall events within a day           | random events composing the subset of C events, the intersection of Ch and Cd is null, $Ch \subseteq C, Cd \cup Ch = C, Cd \cap Ch = \emptyset, 0 \leq P(Ch) \leq P(C)$             | influenced by the frequency of rainfall events generation, and implying the alternation of sunny and rainy in a day |
| I      | an individual rainfall event with different precipitation, intensity and duration ranging from 0 to 72 hours, the time interval between two I events is more than 6 hours | random events, the probability of I event is ratio of numbers of I events to O events over observation $I \subset O, I \cup C = O, I \cap C = \emptyset, 0 \leq P(I) \leq P(O) = 1$ | a driven force of soil erosion, which could be intercepted by vegetation and transformed into throughfall           |
| Ie     | an extreme longest individual rainfall event whose precipitation, intensity and duration were 96.6 mm, 0.022 mm/min, and 71 hours, respectively.                          | random events composing the subset of I events, $Ie \subseteq I, 0 \leq P(Ie) \leq P(I)$                                                                                            | rainfall events with low intensity and longest duration, inclining to infiltration-excess runoff generation         |
| II     | a second longest individual rainfall events types whose average precipitation, intensity and duration were 46.8 mm, 0.026 mm/min, and 31.17 hours, respectively.          | random events composing the subset of I events, the intersection of II and Ie is null, $II \subseteq I, II \cap Ie = \emptyset, 0 \leq P(II) \leq P(I)$                             | rainfall events with low intensity and long duration, inclining to infiltration-excess runoff generation            |
| Is     | A rainfall event type spanning two days whose average precipitation, intensity and duration were 28 mm, 0.049 mm/min, and 10.7 hours, respectively                        | random events composing the subset of I events, $Is \subseteq I, Is \cap II \cap Ie = \emptyset, 0 \leq P(Is) \leq P(I)$                                                            | rainfall events with strongest rainfall intensity in middle duration, inclining to runoff and sediment generation   |
| Iw     | a rainfall event type generating within a day whose average precipitation, intensity and duration were 8.4                                                                | random events composing the subset of I events, $Iw \subseteq I, Iw \cap Is \cap II \cap Ie = \emptyset, Iw \cup Is \cup II \cup Ie =$                                              | rainfall events with fewest and shortest precipitation and duration,                                                |

|   |                                                                                                                        |                                                                                                                   |                                                                         |
|---|------------------------------------------------------------------------------------------------------------------------|-------------------------------------------------------------------------------------------------------------------|-------------------------------------------------------------------------|
|   | mm, 0.035 mm/min, and 5.6 hours, respectively. it usually generates several times within one day.                      | $I, 0 \leq P(Iw) \leq P(I)$                                                                                       | which is different to trigger soil erosion                              |
| R | runoff event type generating on vegetation land types, it occurs on rainfall processes, and its duration is negligible | random events responding to I events, $R \subset I, R \cap C = \emptyset, 0 \leq P(R) < P(I)$                     | influenced by rainfall and vegetation properties.                       |
| S | sediment event occurring on vegetation land types, it occurs on runoff processes, and its duration is negligible       | random events responding to R events, $S \subset R \subset I, S \cap C = \emptyset, 0 \leq P(S) \leq P(R) < P(I)$ | driven by R events, and affected by rainfall and vegetation properties. |
